# Supplementary material
Source: publisher site journal article supplement (https://www.dovepress.com/article/332026)
Supplement: Supplementary file 1 [file get_supplementary_file.php]

**SUPPLEMENTARY TABLES AND FIGURES**

Supplementary Table 1. Statistical analysis of time to steady-state for risperidone active moiety by Helmert Contrast Transformation (PK population) in Risperidone ISMtreatment.

|  | Dose | Geometric LS Means | Treatment Comparison | Geometric LS Means | 90% CI of the Ratio | |  |
| --- | --- | --- | --- | --- | --- | --- | --- |
| PK parameter | Lower | Upper | p-value |
| Cmin ss (ng/mL) | 1 | 24.12 | Dose 1 vs Average of Dose 2 to 4 | 0.9250 | 0.8182 | 1.0457 | 0.2946 |
|  | 2 | 24.16 | Dose 2 vs Average of Dose 3 to 4 | 0.8919 | 0.7831 | 1.0158 | 0.1477 |
|  | 3 | 25.34 | Dose 3 vs Dose 4 | 0.9983 | 0.8591 | 1.1601 | 0.9850 |
|  | 4 | 28.97 |  |  |  |  |  |

The number of subjects included in this analysis with measurable trough concentrations is 48; Twenty-four hours after the last dose of 7-day treatment with 4 mg oral risperidone once daily dose Geometric LS Means for Cmax (ng/mL) was 19.98.; Risperidone ISM treatment consist in a single intramuscular dose of 100 mg risperidone ISM every 4 weeks from Days 8 to 92.

Supplementary Table 2. Summary of treatment-related TEAEs (Safety Population)

| Preferred Term | Oral risperidone N=81 | Risperidone ISM  N=73 | Total N=81 |
| --- | --- | --- | --- |
|  | n (%) | n (%) | n (%) |
| Subjects with treatment-related TEAEs | 26 (32.1) | 34 (46.6) | 46 (56.8) |
| Subjects with at least one treatment-related TEAE leading to early discontinuation | 1 (1.2) | 1 (1.4) | 2 (2.5) |
| Akathisia | 0 | 4 (5.5) | 4 (4.9) |
| Constipation | 2 (2.5) | 1 (1.4) | 3 (3.7) |
| Headache | 2 (2.5) | 1 (1.4) | 3 (3.7) |
| Hyperprolactinaemia | 10 (12.3) | 5 (6.8) | 15 (18.5) |
| Increased appetite | 1 (1.2) | 3 (4.1) | 4 (4.9) |
| Somnolence | 14 (17.3) | 11 (15.1) | 16 (19.8) |
| Weight increased | 0 | 15 (20.5) | 15 (18.5) |

TEAEs = Treatment-emergent Adverse Event; Descriptions of TEAEs are coded using the Medical Dictionary for Regulatory Activities (MedDRA), version 21. Treatment-related TEAEs listed occurred in ≥2% of patients; Oral risperidone treatment = a single oral dose of 4 mg risperidone once daily from Days 1 to 7; Risperidone ISM treatment = a single IM dose of 100 mg Risperidone ISM every 4 weeks from Days 8 to 92.

Supplementary Figure 1. Mean (±SD) steady-state plasma concentrations versus time profiles for risperidone active moiety after the 7th daily dose of oral risperidone (PK population)
